# Supplementary material for: Voltage-tunable portable power supplies based on tailored integration of modularized silicon photovoltaics and printed bipolar lithium-ion batteries
Source: Royal Society of Chemistry journal article supplement (doi:10.1039/d0ta04843g), 2020-01-01
Supplement: d0ta04843g1.pdf [file d0ta04843g1.pdf]

## Electronic Supplementary Information

# **Voltage-tunable portable power supplies based on tailored integration of modularized silicon photovoltaics and printed bipolar lithium-ion batteries**

Jung-Hui Kim<sup>a,†</sup>, Inchan Hwang<sup>a,†</sup>, Se-Hee Kim<sup>a</sup>, Jeonghwan Park<sup>a</sup>, Wonjoo Jin<sup>a</sup>,

Kwanyong Seo<sup>a,\*</sup>, Sang-Young Lee<sup>a,b,\*</sup>

<sup>a</sup> *Department of Energy Engineering, School of Energy and Chemical Engineering, Ulsan National Institute of Science and Technology (UNIST), Ulsan, 689-798, South Korea.*

*E-mail: [syleek@unist.ac.kr](mailto:syleek@unist.ac.kr); Tel: +82-52-217-2948*

**Fig. S1.** Fabrication process charts of the dopant-free back-surface-field based IBC cSiPVs

**Fig. S2.** Current density-voltage curve of the IBC cSiPV

**Fig. S3.** Reflectance curves of the IBC cSiPV module with optical film.

**Fig. S4.** Characterization of electrode using surface treated CB.

**Fig. S5.** Rheological properties of the LTO anode paste.

**Fig. S6.** Electrochemical characterization of components of bQSSB.

**Fig. S7.** Schematic illustration of manufacturing steps of the cSiPV–bQSSB.

**Fig. S8.** Cross-sectional SEM and corresponding EDS images of the bQSSB showing the multi-layered structure.

**Fig. S9.** Power-voltage curves of the IBC cSiPV modules.

**Fig. S10.** Comparison of the cSiPV–bQSSB and a control PV–battery.

**Fig. S11.** Schematic illustration showing the structure of portable power supplies based on tailored integration of cSiPV-QSSBs with a wide range of operating voltage (2.7 – 13.5 V).

**Fig. S12.** OCV profiles of the cSiPV–bQSSB.

**Fig. S13.** Photo-charge/galvanostatic discharge cycling behavior of the cSiPV–bQSSB.

**Fig. S14.** Thermal stability of the cSiPV–bQSSB.

**Fig. S15.** Photographs of the portable GPS combined with the cSiPV–bQSSB.

**Table S1.** Photovoltaic parameters of the IBC cSiPV modules as a function of the number of the series-connected PV unit cells.

**Table S2.** Electrochemical performances of the previously reported photo-rechargeable power sources (vs. this study).

**Movie S1.** 24h-time lapse video showing the continuous operation of a LED lamp powered by the cSiPV-bASSB.

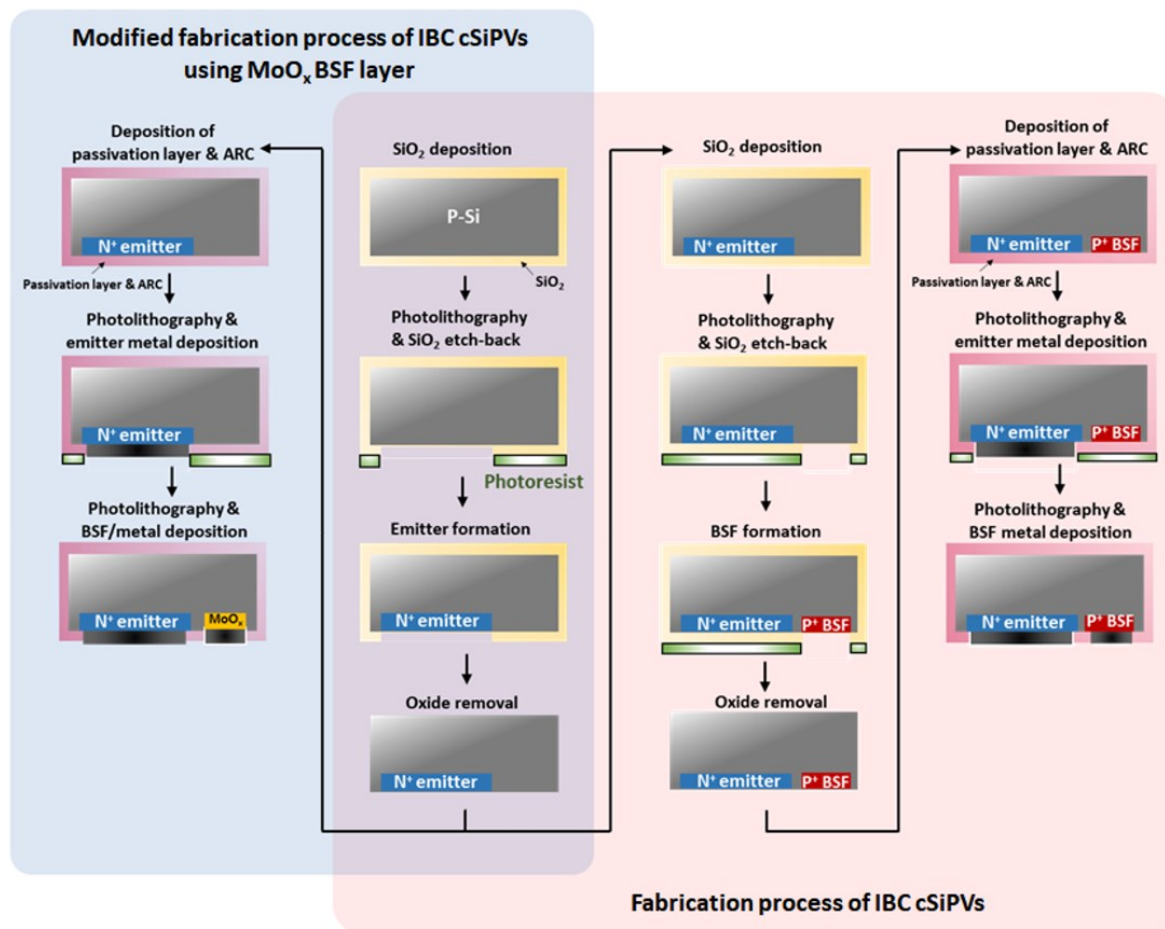

**Fig. S1.** Fabrication process charts of the conventional (red area) and dopant-free back-surface-field based IBC cSiPVs (blue area).

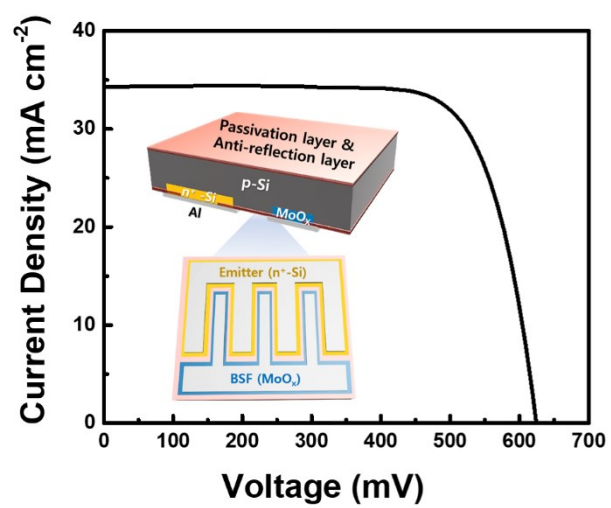

**Fig. S2.** Current density-voltage curve of the IBC cSiPV (inset shows the schematic image of the IBC cSiPV).

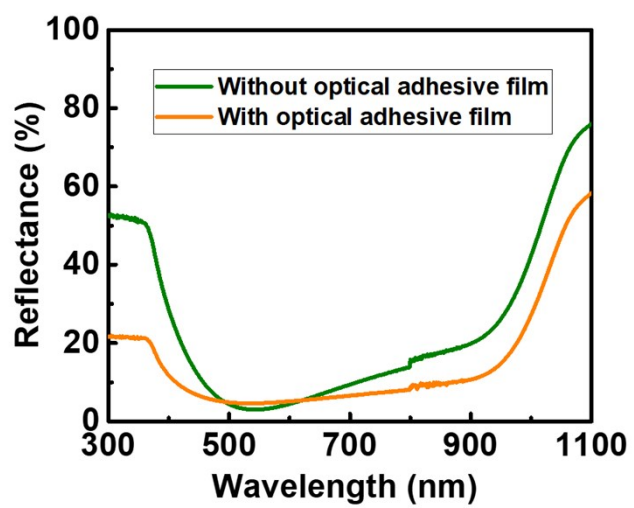

**Fig. S3.** Reflectance curves of the IBC cSiPV module with (red line) and without (black line) optical film.

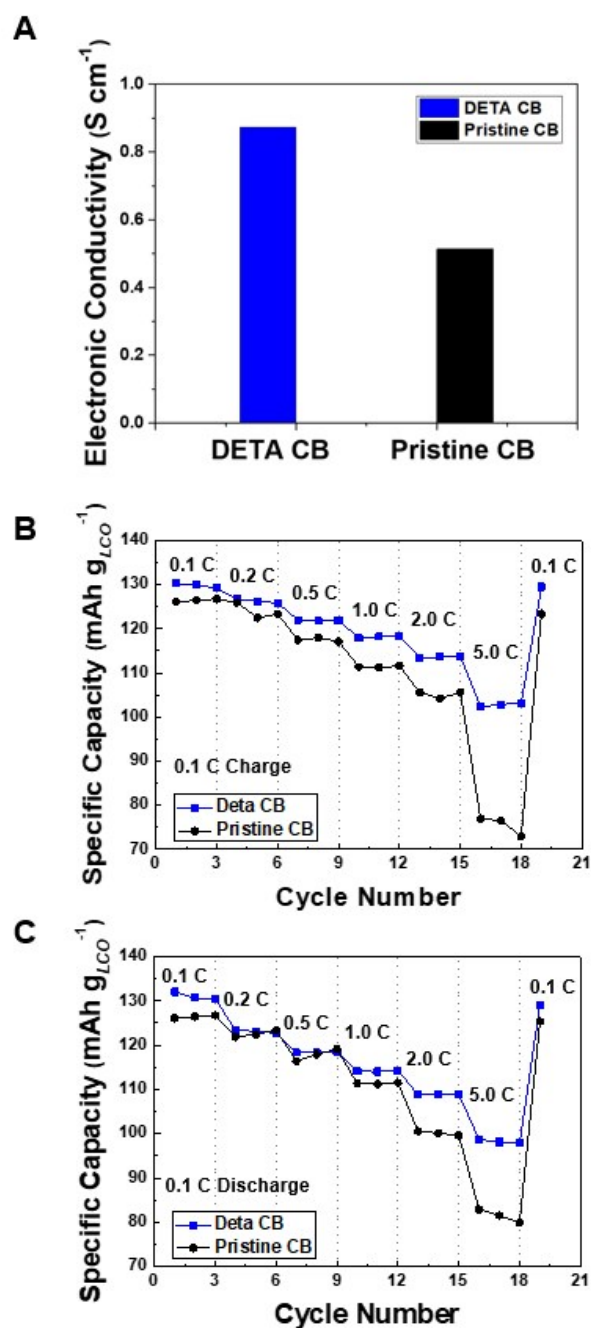

**Fig. S4.** Characterization of electrode using surface treated CB. (A) Electronic conductivities of the model LCO cathodes fabricated by conventional slurry casting method: pristine CB vs. DETA CB. (B) Discharge rate capability of the printed LCO half cells (Pristine CB vs. with DETA CB) over a wide range of discharge current densities from 0.1 C (= 0.08 mA cm<sup>-2</sup>) to 5.0 C. (C) Charge rate capability over a wide range of charge current densities (varying from 0.1C (= 0.08 mA cm<sup>-2</sup>) to 5.0 C) at a fixed discharge current density of 0.1 C.

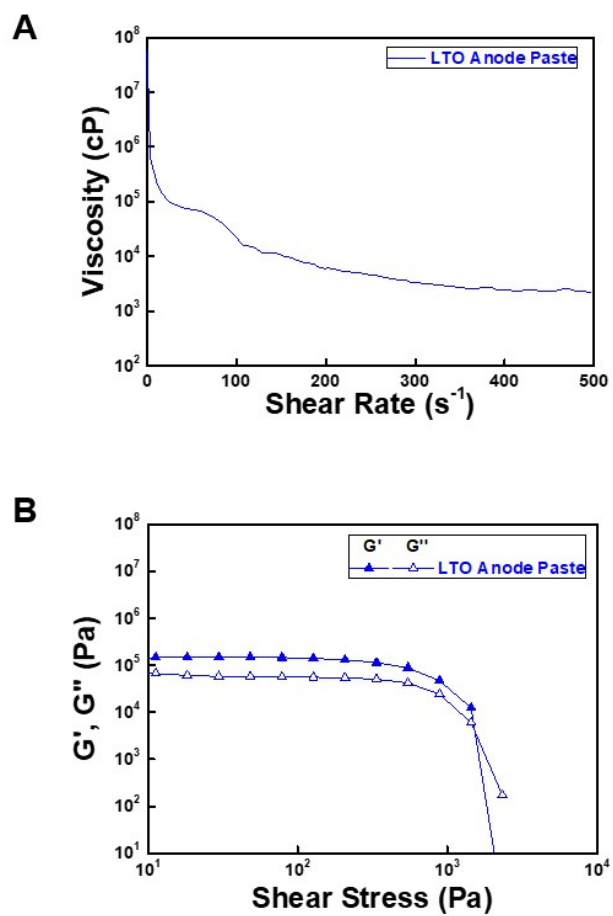

**Fig. S5.** Rheological properties of the LTO anode paste. (A) Viscosity as a function of shear rate. (B) Viscoelastic properties ( $G'$  and  $G''$ ) as a function of shear stress.

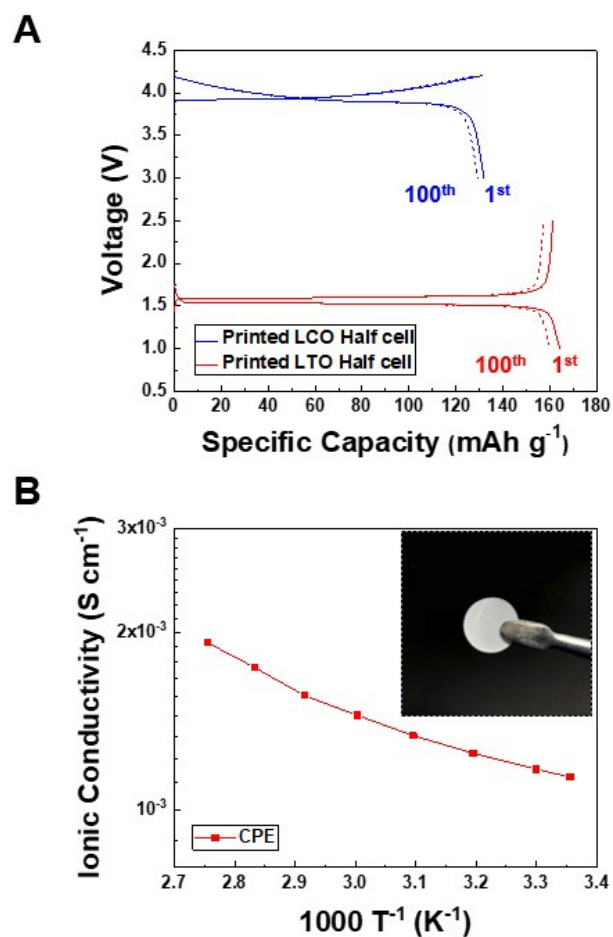

**Fig. S6.** Electrochemical characterization of components of bQSSB. (A) Charge-discharge profiles of the half cells containing the printed LCO cathode (or LTO anode), in which the cells were cycled at a fixed charge/discharge current density of 0.1 C/ 0.1 C at 25 °C. (B) Ionic conductivity of the CPE as a function of temperature. Inset shows a photograph of the CPE.



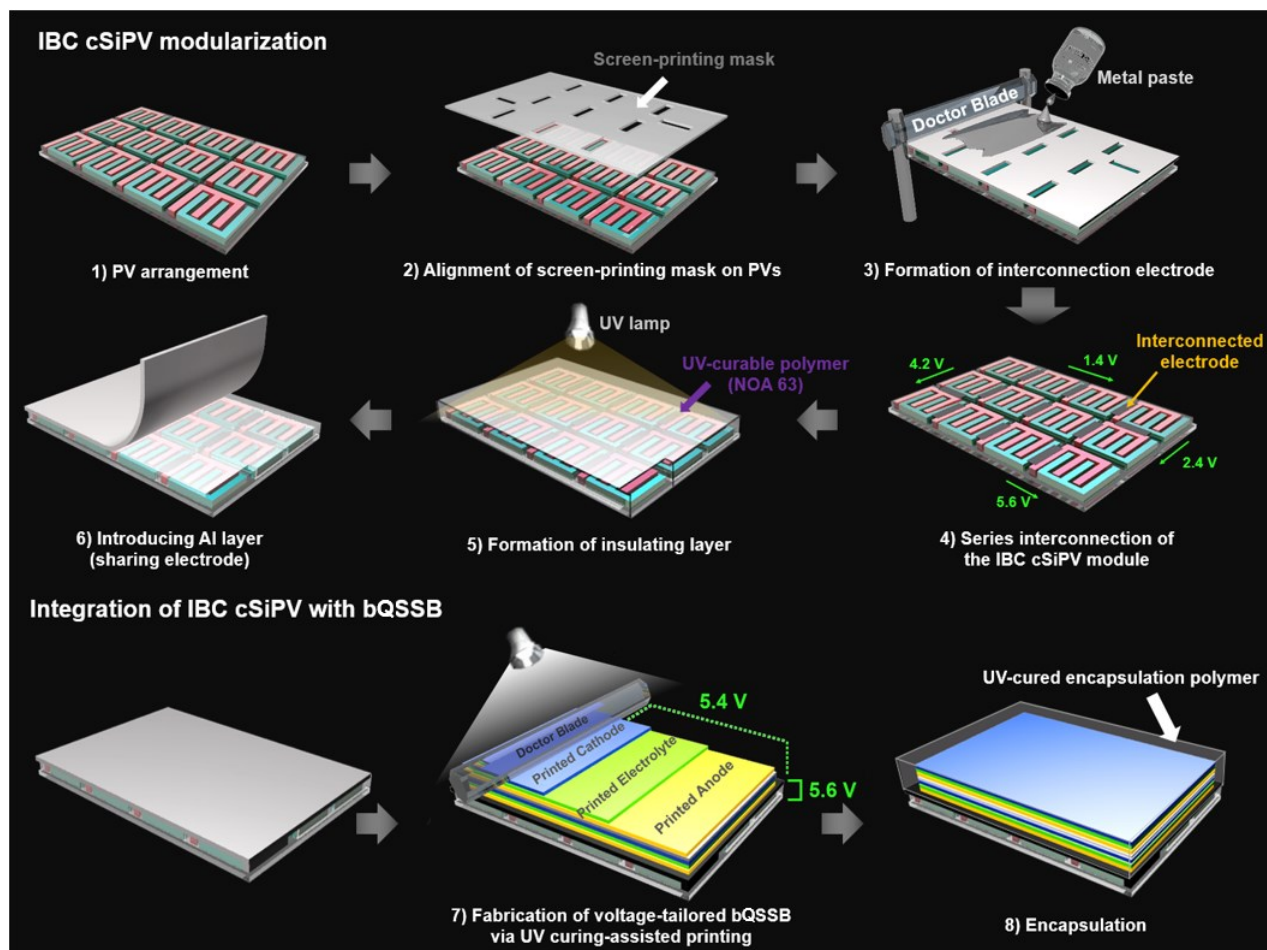

**Fig. S7.** Schematic illustration showing the stepwise manufacturing steps of cSiPV–bQSSB.

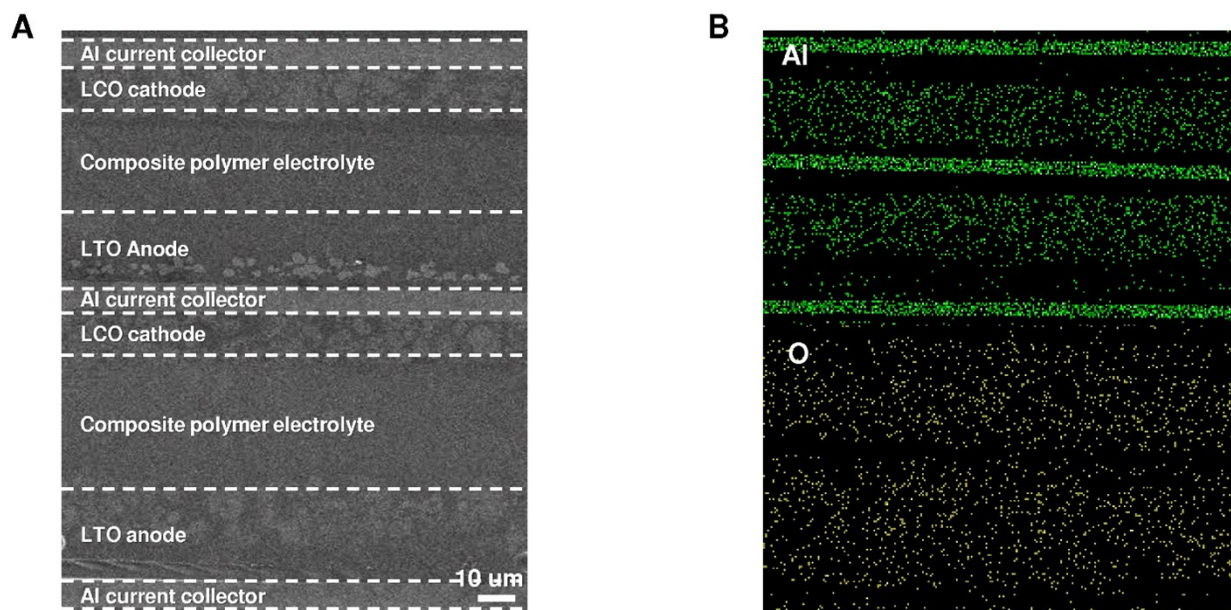

**Fig. S8.** Cross-sectional SEM and corresponding EDS images of the bQSSB showing the multi-layered structure.

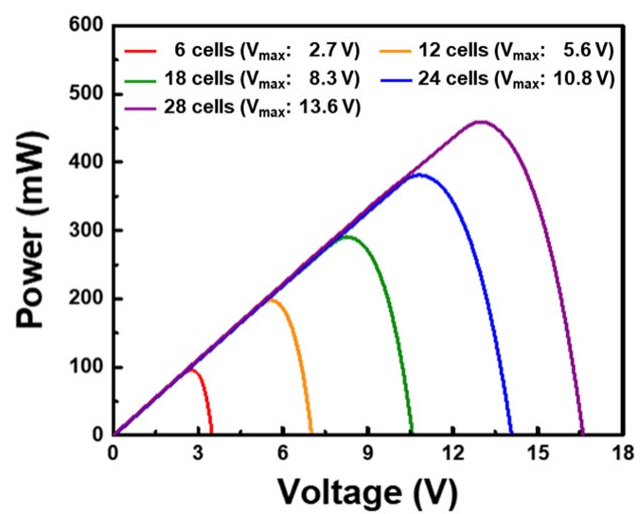

**Fig. S9.** Power-voltage curves of the IBC cSiPV modules as a function of the number of the series-connected PV unit cells.

**A**

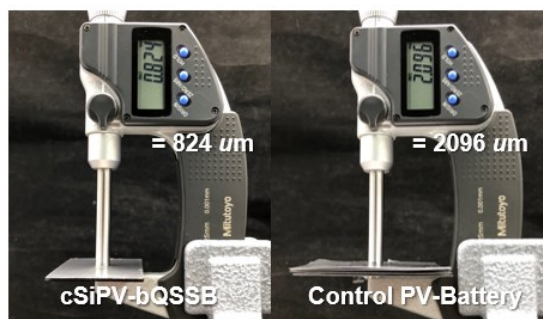

**B**

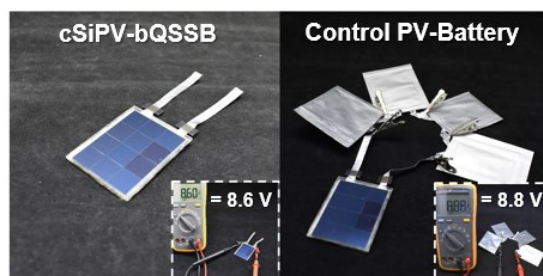

**Fig. S10.** Comparison of cSiPV-bQSSB and a control PV-battery (one cSiPV module with four conventional lithium-ion batteries connected in-series). (A) Thickness. (B) Photographs. Inset shows open circuit voltages of the two power systems.

### Voltage-tunable cSiPV-bQSSBs based on tailored integration (2.7-13.5 V)

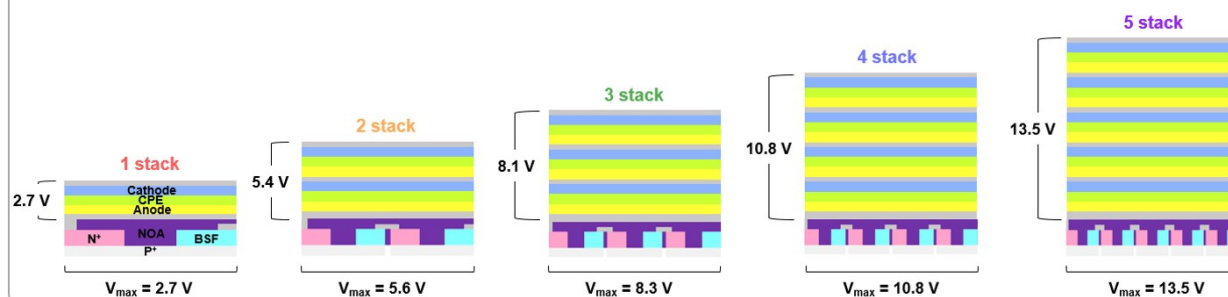

**Fig. S11.** Schematic illustration showing the structure of portable power supplies based on tailored integration of cSiPV-QSSBs with a wide range of operating voltage (2.7 – 13.5 V).

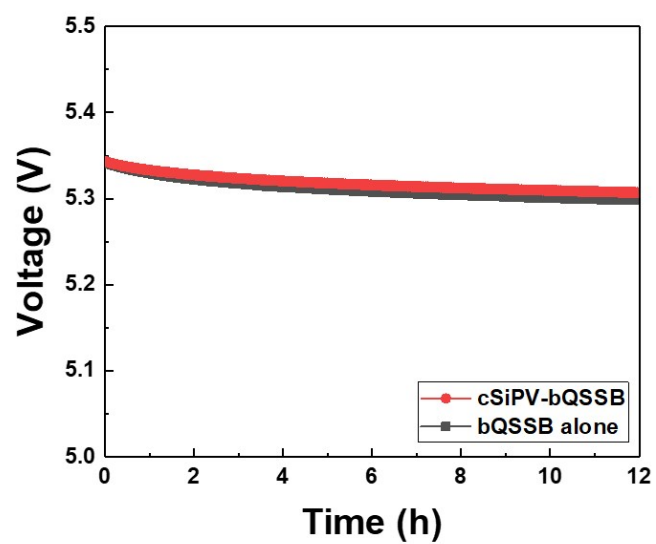

**Fig. S12.** OCV profiles of the cSiPV–bQSSB and bQSSB alone as a function of elapsed time.

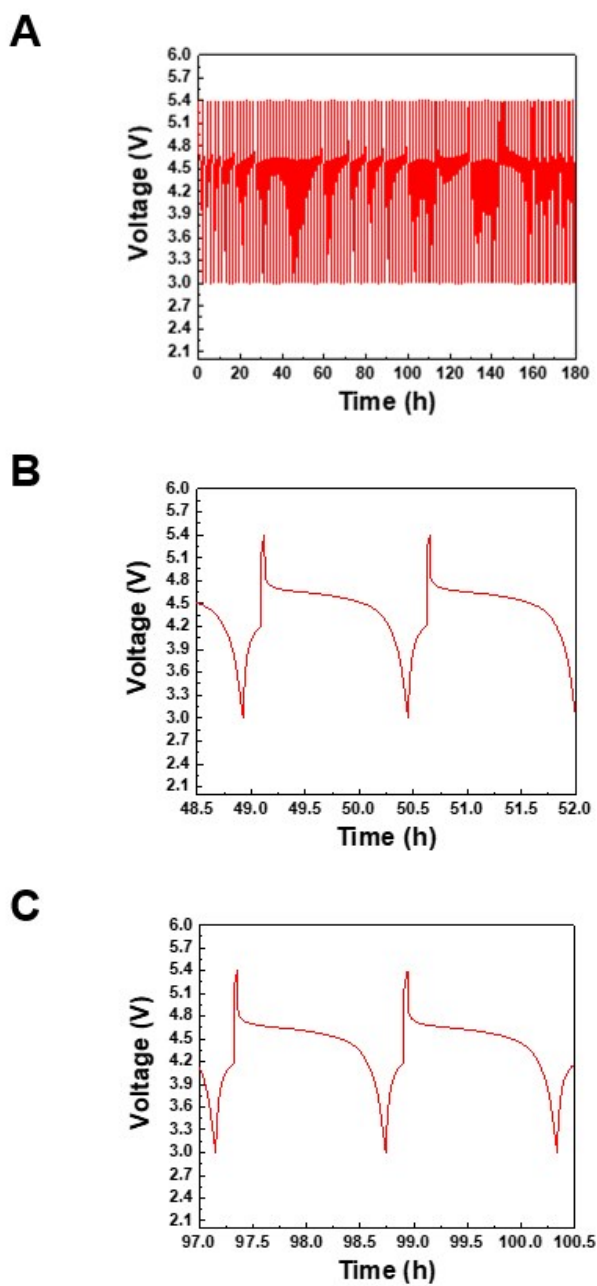

**Fig. S13.** (A) Photo-charge/galvanostatic discharge cycling behavior of the cSiPV-bQSSB as a function of time, in which the integrated power system was photo-charged just for 1 min under 1 Sun and galvanostatically discharged at a discharge current density of 0.1 C. Photo-charge/galvanostatic discharge profiles of the integrated power system: (B) at 50 h and (C) at 100 h.

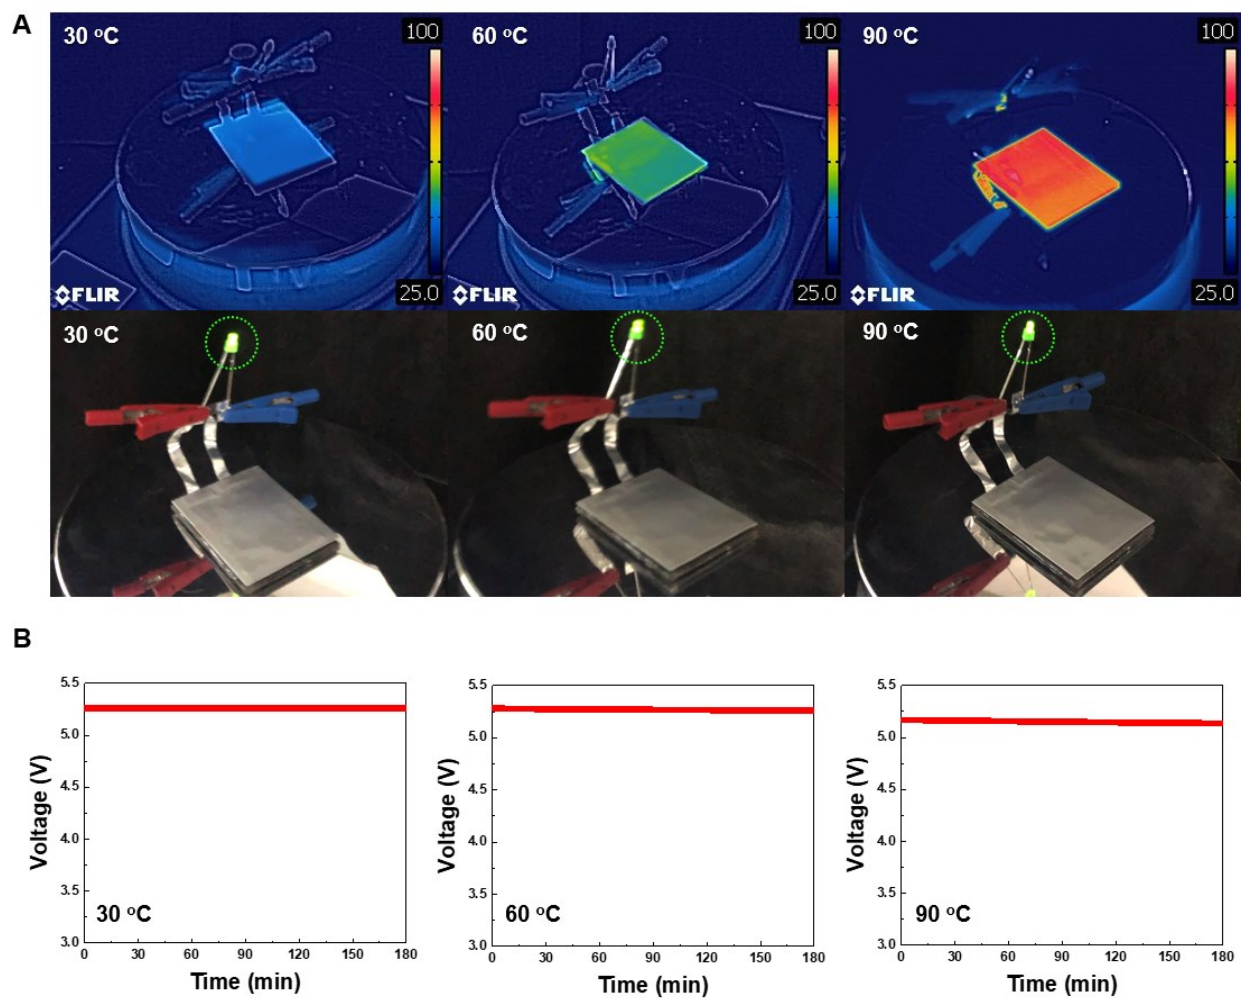

**Fig. S14.** Thermal tolerance of the cSiPV-bQSSB. (A) Photographs showing the dimensional stability and the normal operation of a LED after being placed on a hot plate for 3 h. (B) OCV profiles at different temperatures as a function of elapsed time.



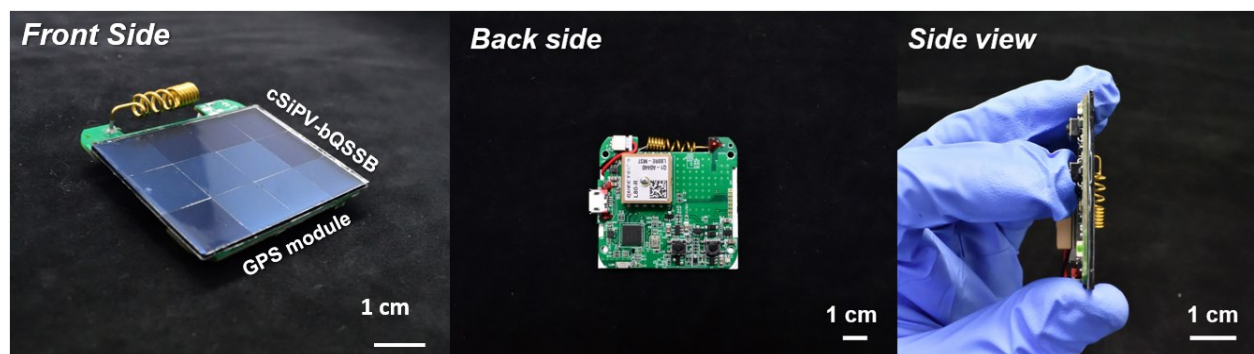

**Fig. S15.** Photographs of the portable GPS combined with the cSiPV–bQSSB.

**Table S1.** Photovoltaic parameters of the IBC cSiPV modules as a function of the number of the series-connected PV unit cells.

|                | 6 cells | 12 cells | 18 cells | 24 cells | 28 cells |
|----------------|---------|----------|----------|----------|----------|
| $I_{sc}$ (mA)  | 36.7    | 37.1     | 37.0     | 37.2     | 37.3     |
| $V_{oc}$ (V)   | 3.5     | 7.1      | 10.6     | 14.0     | 16.6     |
| $I_{max}$ (mA) | 34.9    | 35.3     | 35.2     | 35.4     | 33.5     |
| $V_{max}$ (V)  | 2.7     | 5.6      | 8.3      | 10.8     | 13.6     |
| FF (%)         | 74.5    | 75.7     | 74.5     | 73.1     | 73.1     |
| Efficiency (%) | 15.9    | 16.5     | 16.1     | 15.9     | 16.2     |
| Power (mW)     | 94.2    | 197.7    | 292.2    | 382.3    | 452.2    |

1 **Table S2.** Electrochemical performances of the previously reported photo-rechargeable power sources (vs. this study).

2

| Overall Configuration                                                              | Power sources    | V <sub>operating</sub><br>(V) | PCE/PSE<br>(%) | Overall Eff<br>(%) | Cycle<br>(h) | Ref.       |
|------------------------------------------------------------------------------------|------------------|-------------------------------|----------------|--------------------|--------------|------------|
| Discrete connection<br>(via electrical wires)                                      | PSC – LIB        | 2.5                           | 12.3 / 60.0    | 7.36               | 45           | (9)        |
|                                                                                    | QSC – LIB        | 4.3                           | 10.0 / 91.6    | 9.16               | -            | (10)       |
|                                                                                    | Si-PV - LIB      | 7.4                           | 3.8 / -        | -                  | -            | (11)       |
|                                                                                    | Si-PV – LIB      | 4.2                           | -              | -                  | -            | (12)       |
|                                                                                    | PSC – MPPT – LIB | 3.0                           | 14.2 / 77.2    | 9.36               | 20           | (13)       |
| Direct integration<br>&<br>Photo-assisted integration<br>(electrochemical hybrids) | DSSC – LIB       | 3.3                           | 2.0 / 41.0     | 0.82               | 1.4          | (14)       |
|                                                                                    | Si-PV – LIB      | 5.4                           | 15.8 / 48.0    | 7.61               | 30           | (15)       |
|                                                                                    | DSSC – LIB       | 3.5                           | -              | 0.06               | -            | (16)       |
|                                                                                    | PSC – LIB        | 3.0                           | 0.03 / -       | -                  | 25           | (17)       |
|                                                                                    | DSSC – Li-O2     | 3.0                           | -              | -                  | 8            | (18)       |
|                                                                                    | DSSC – RFB       | 3.6                           | -              | -                  | -            | (19)       |
|                                                                                    | DSSC – RFB       | 0.6                           | - / 62.5       | -                  | 17           | (20)       |
|                                                                                    | DSSC – RFB       | 0.8                           | -              | -                  | -            | (21)       |
|                                                                                    | DSSC – RFB       | 0.8                           | 1.7 / 78.0     | 1.33               | -            | (22)       |
|                                                                                    | Si-PV – LIB      | Adjustable<br>(2.7 ~ 13.5)    | 16.4 / 62.0    | 10.20              | 180          | This study |

3

4
